# Supplementary material for: Collagen peptide-loaded W1/O single emulsions and W1/O/W2 double emulsions: influence of collagen peptide and salt concentration, dispersed phase fraction and type of hydrophilic emulsifier on droplet stability and encapsulation efficiency
Source: Royal Society of Chemistry journal article supplement (doi:10.1039/c8fo02467g), 2019-01-01
Supplement: c8fo02467g1.pdf [file c8fo02467g1.pdf]

658 SUPPLEMENTARY DATA.

659

660 **S-Figure 1. Microscope images of collagen peptide (CP)- $W_1/O/W_2$  double emulsions**  
661 **with different water fractions in the outer  $W_1/O/W_2$  emulsions ( $\Phi_{W_2}$ ): (a)  $\Phi_{W_2} = 50\%$ .**  
662 **(b)  $\Phi_{W_2} = 60\%$ , (c)  $\Phi_{W_2} = 70\%$  and (d)  $\Phi_{W_2} = 80\%$ .** All emulsions were prepared under the  
663 following conditions: 10% collagen peptide and 1% NaCl concentration in the inner water  
664 phase; 40% water fraction in the inner  $W_1/O$  emulsions.

665

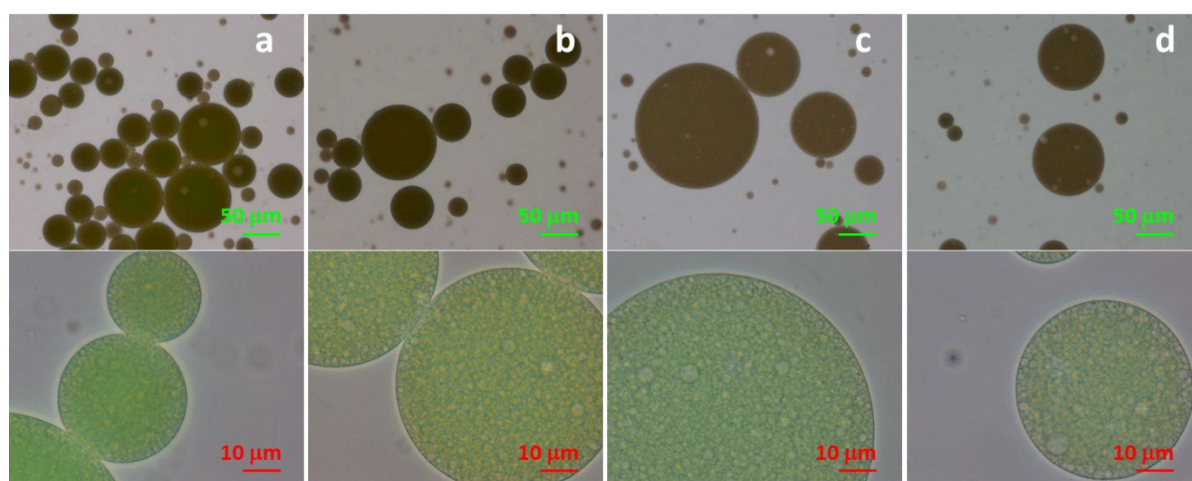

667

668

669

670

671

672

673
